# Supplementary material for: Characterization of Bioactive Metabolites and Antioxidant Activities in Solid and Liquid Fractions of Fresh Duckweed (Wolffia globosa) Subjected to Different Cell Wall Rupture Methods
Source: PubMed Central journal article supplement — ACS Omega. 2024 Apr 23;9(18):19940–55. doi: 10.1021/acsomega.3c09674 (PMC11080017; doi:10.1021/acsomega.3c09674), 2024-04-23
Supplement: ao3c09674_si_001.pdf [file ao3c09674_si_001.pdf]

Supplementary data

**Characterization of bioactive metabolites and antioxidant activities in solid and liquid fractions of fresh Duckweed (*Wolffia globosa*) subjected to different cell wall rupture methods**

**Nitesh Kumar Yadav<sup>1</sup>, Arun Bhai Patel<sup>1\*</sup>, Sourabh Debbarma<sup>2</sup>, M. Bhargavi Priyadarshini<sup>3</sup>, Himanshu Priyadarshi<sup>4</sup>**

1. Department of Aquaculture, College of Fisheries, Central Agriculture University (Imphal) Lembucherra, Tripura (West) 799210
2. Department of Aquatic Health & Environment, College of Fisheries, Central Agriculture University (Imphal) Lembucherra, Tripura (West) 799210
3. Department of Fish Processing Technology & Engineering, College of Fisheries, Central Agriculture University (Imphal) Lembucherra, Tripura (West) 799210
4. Department of Fish Genetics and Reproduction, College of Fisheries, Central Agriculture University (Imphal) Lembucherra, Tripura (West) 799210

**\*Corresponding author:**

Arun Bhai Patel

Department of Aquaculture

College of Fisheries, Central Agricultural University (Imphal), Lembucherra, Agartala, Tripura-799210, India

Email: [arun.b.patel@gmail.com](mailto:arun.b.patel@gmail.com)

Mobile.No: +91 9436540812

**Figure S1. Chemical structures of tentatively identified phenolic compounds in wolffia filtrate and residue samples using LC-ESI-QTOF-MS/MS**

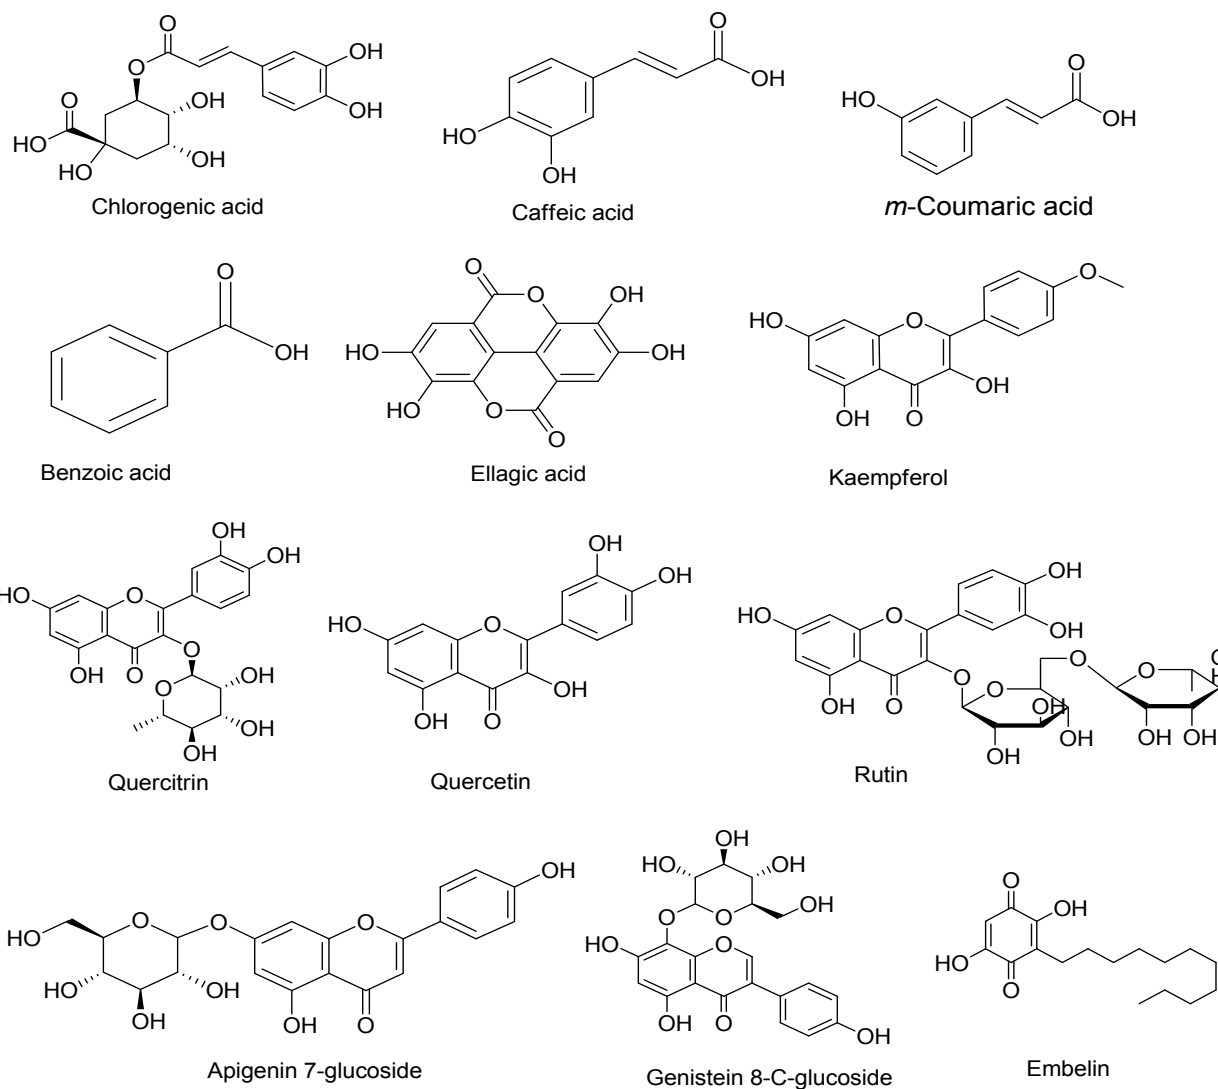

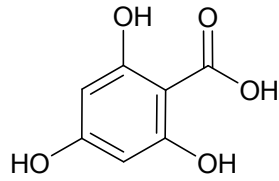

2,4,6-Trihydroxybenzoic acid

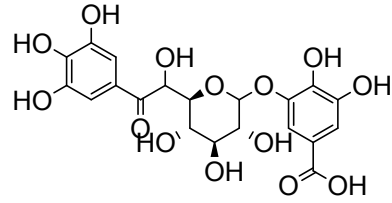

Gallic acid 3-O-(6-galloylglucoside)

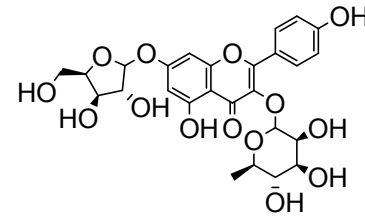

Kaempferol 3-rhamnoside 7-xyloside

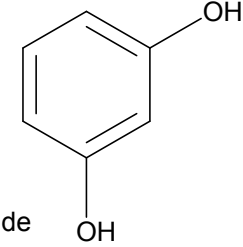

Resorcinol

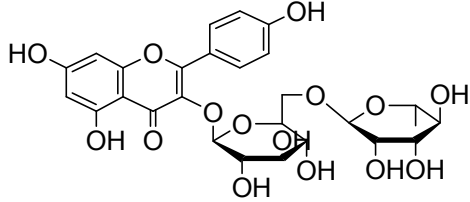

Nicotiflorin

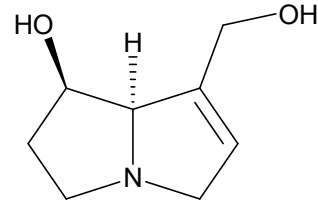

Retronecine

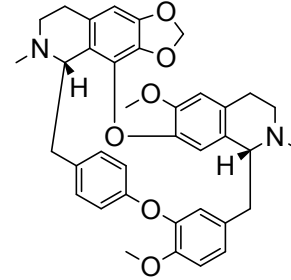

Cepharanthine

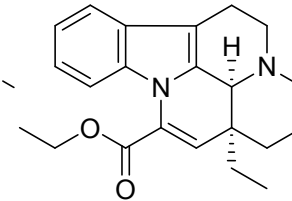

Vinpocetine

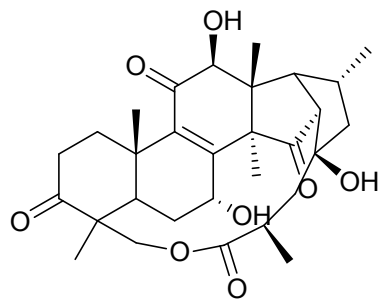

Ganosporelactone A

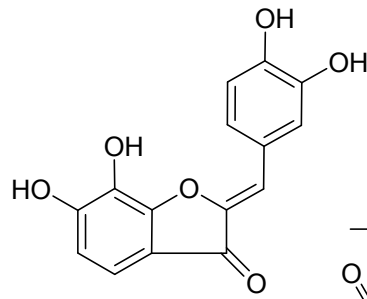

Maritimetin

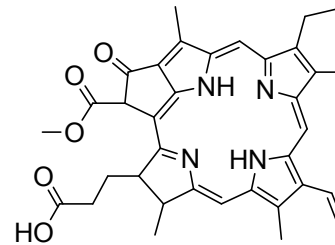

Pheophorbide a

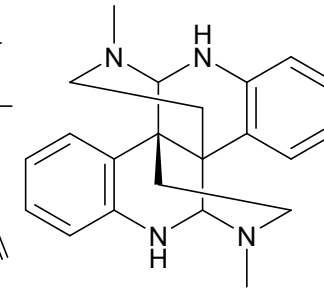

Calycanthine

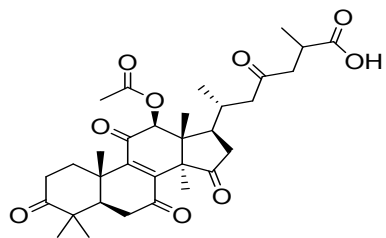

Ganoderic acid F

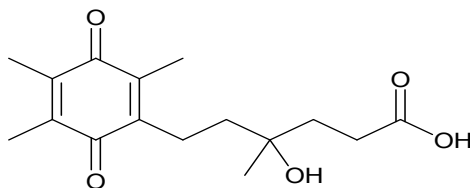

Tocopheronic acid

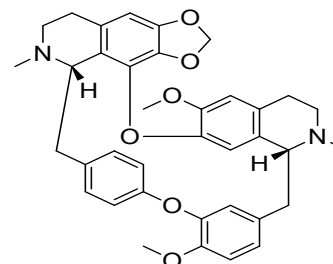

Cepharanthine

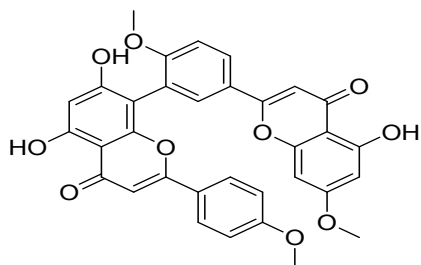

Sciadopitysin

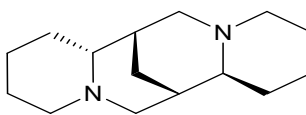

(-)-Sparteine

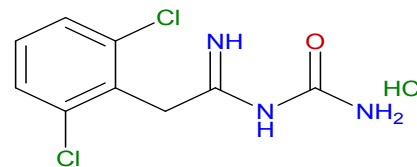

Terminaline

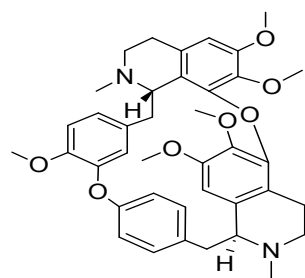

Thalidasine

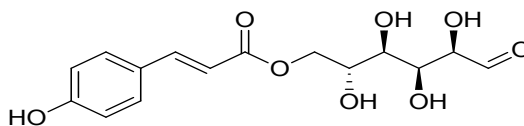

6-O-*p*-Coumaroyl-D-glucose

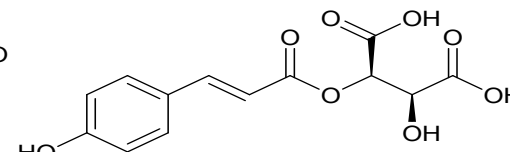

Mono-*trans-p* coumaroylmesotartaric acid

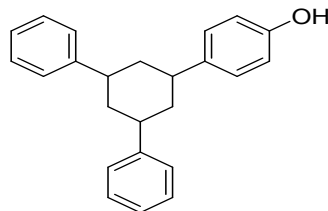

4-(3,5-Diphenylcyclohexyl)phenol

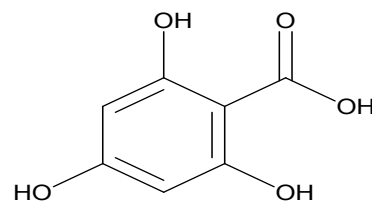

2,4,6-Trihydroxybenzoic acid

**Figure S2. MS/MS data of phenolic compounds tentatively identified in wolffia samples using LC-ESI-QTOF-MS/MS**

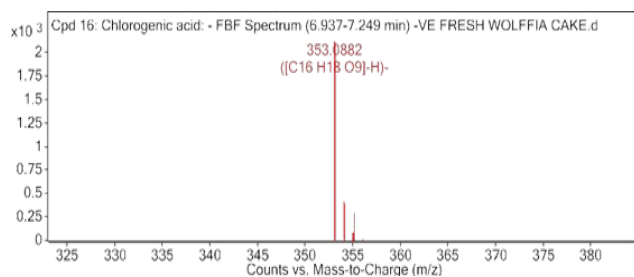

**Chlorogenic acid**

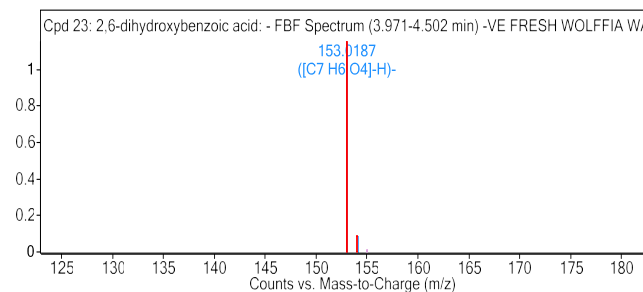

**2,6-dihydroxybenzoic acid**

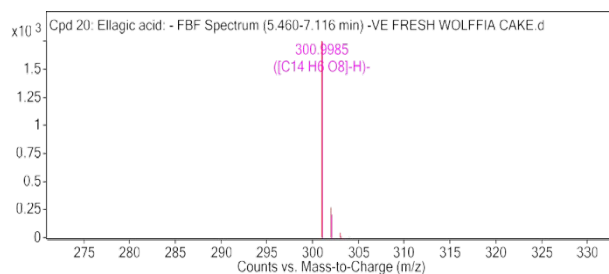

**Ellagic acid**

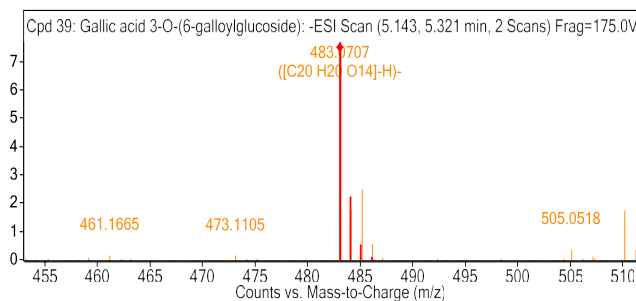

**Gallic acid 3-O-(6-galloylglucoside)**

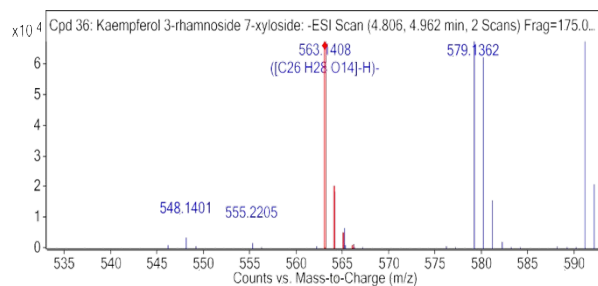

**Kaempferol 3- rhamnoside 7-xyloside**

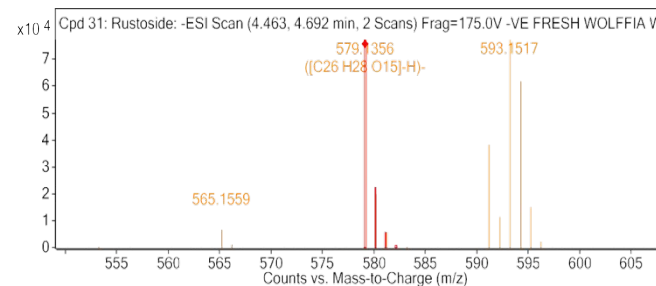

**Rustoside**

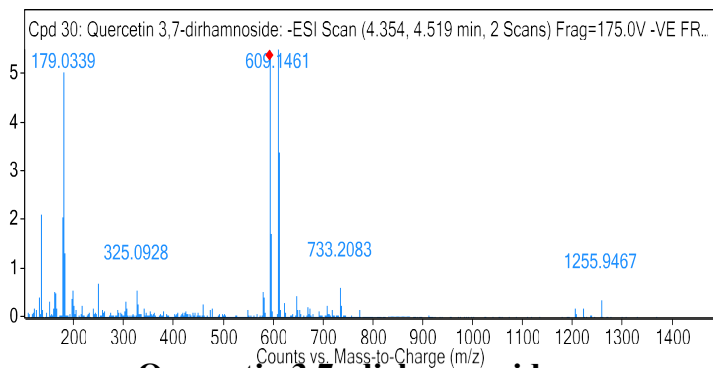

**Quercetin 3,7-dirhamnoside**

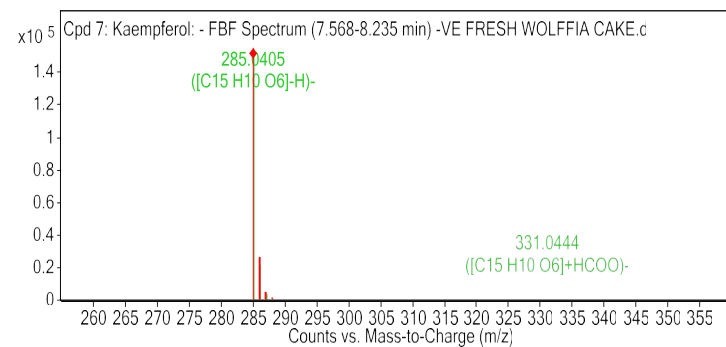

**Kaempferol**

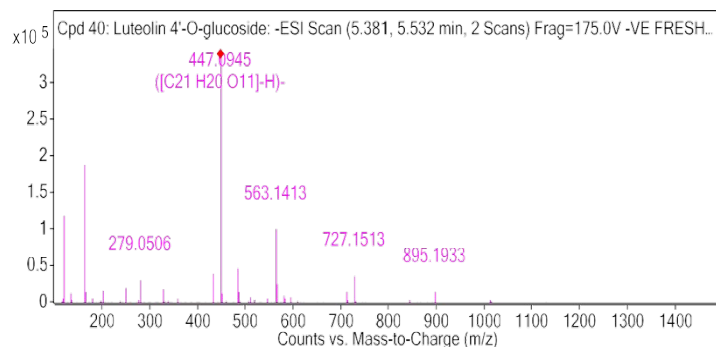

**Luteolin 4'-O-glucoside**

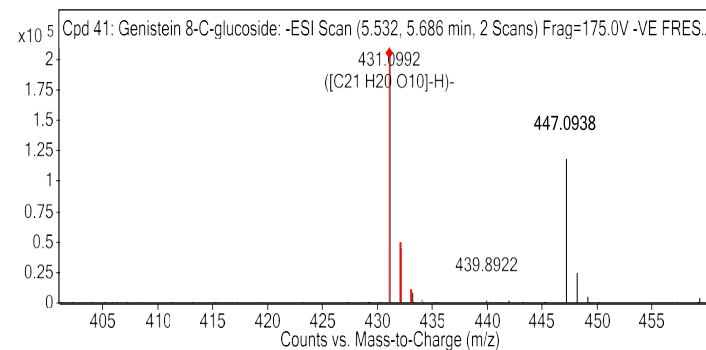

**Genistein 8-C-glucoside**

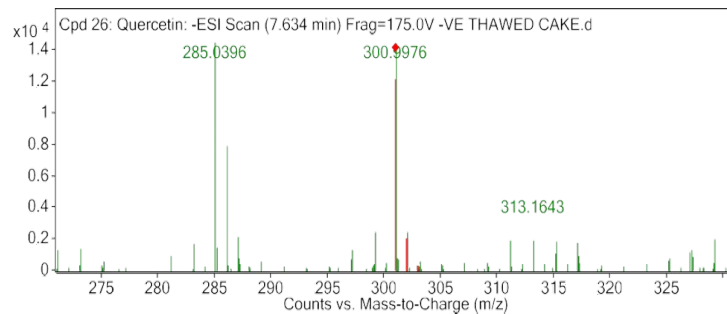

**Quercetin**

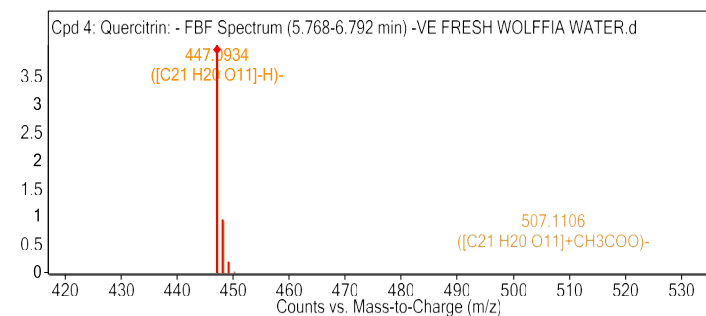

**Quercitrin**

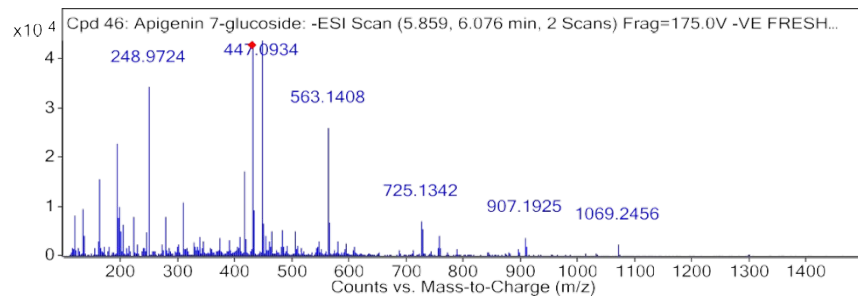

**Apigenin 7-glucoside**

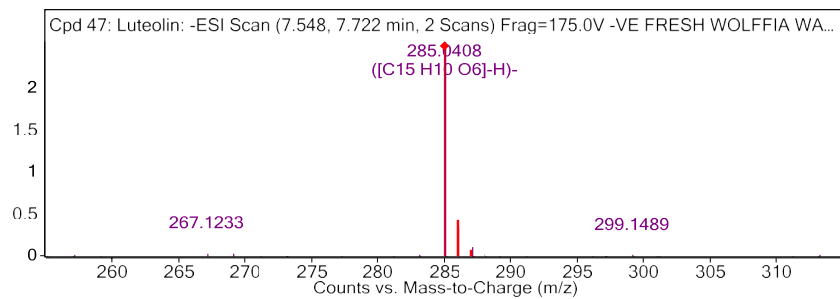

**Luteolin**

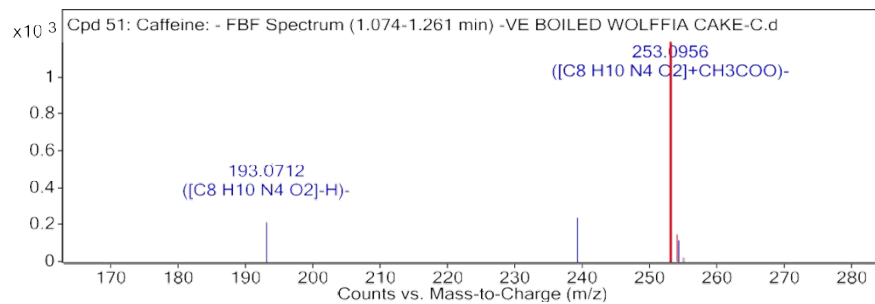

**Caffeine**

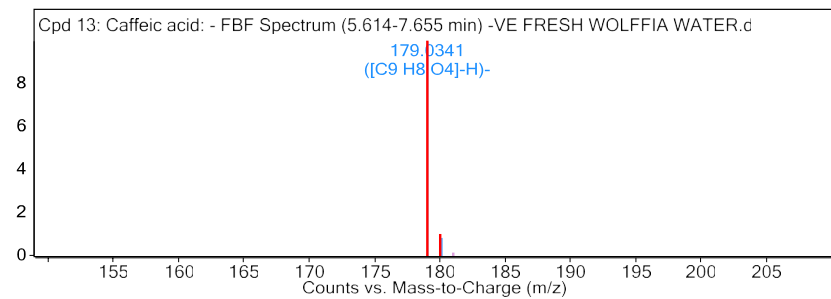

**Caffeic acid**

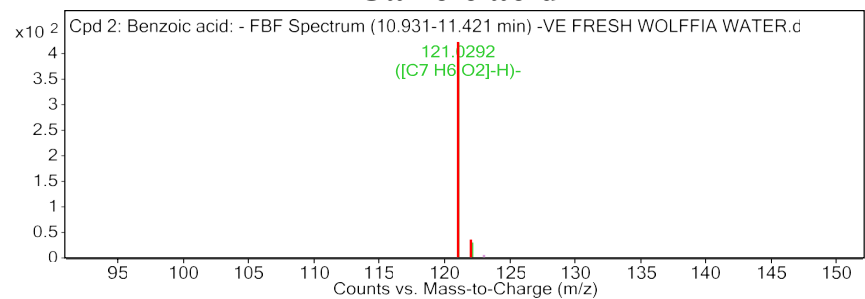

**Benzoic acid**

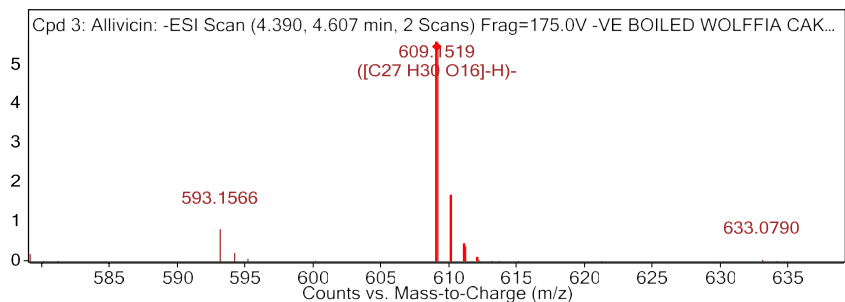

**Allivcin**

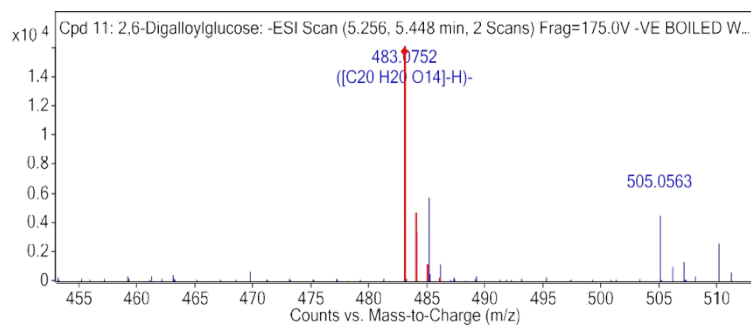

**2,6-Digalloylglucose**

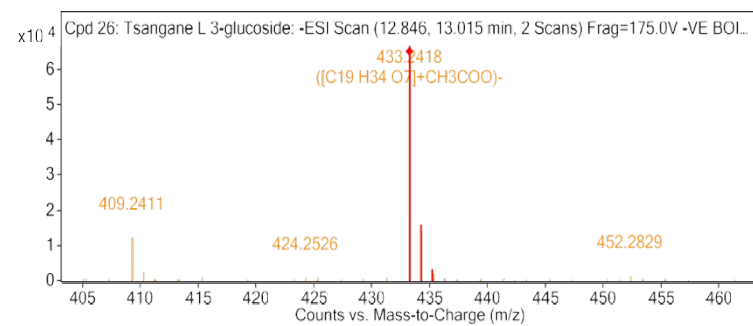

**Tsangane L 3-glucoside**

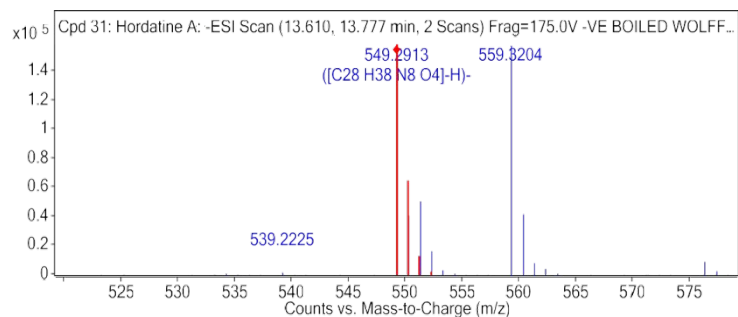

**Hordatine A**

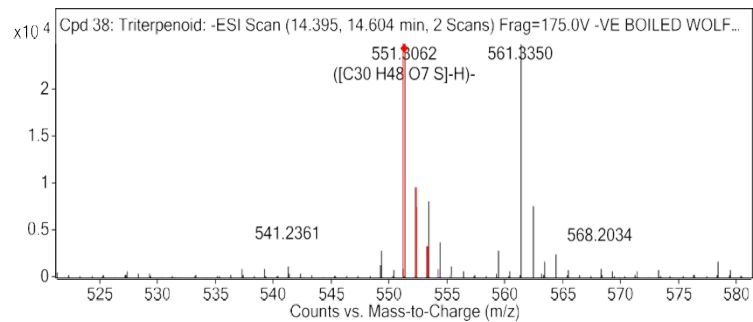

**Triterpenoid**

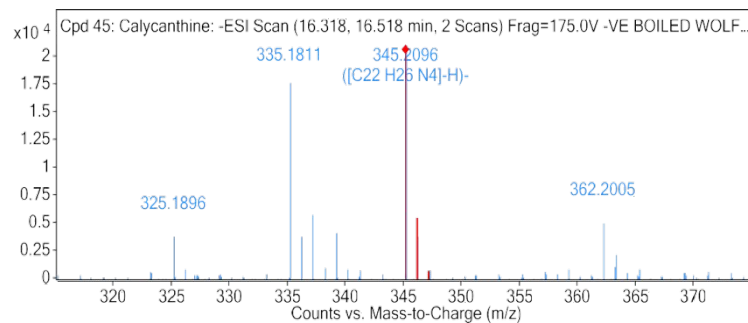

**Calycanthine**

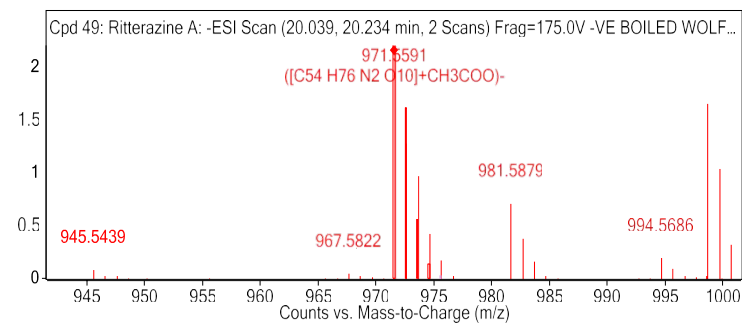

**Ritterazine A**



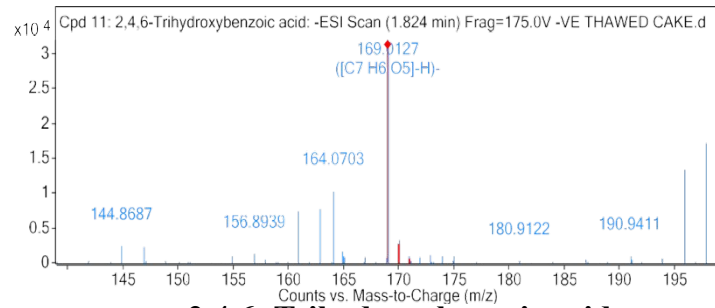

**2,4,6- Trihydroxybenzoic acid**

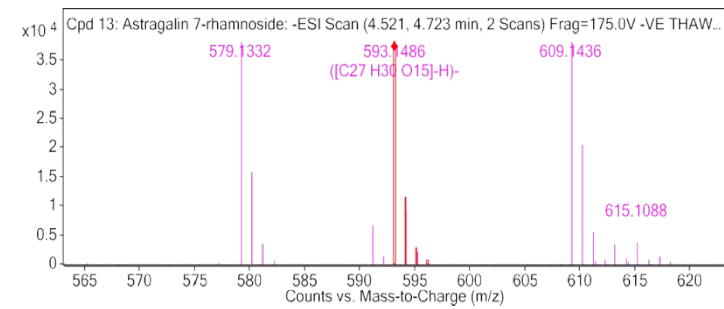

**Astragalin 7- rhamnoside**

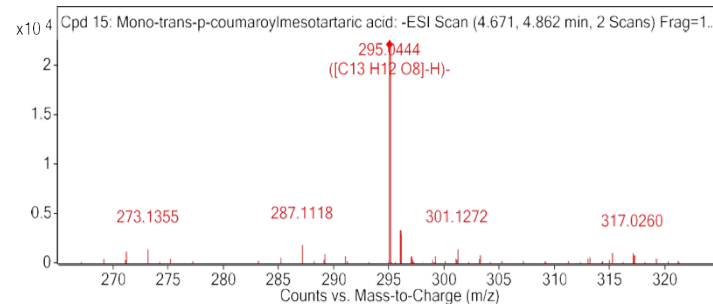

**Mono-trans-p-coumaroylmesotartaric acid**

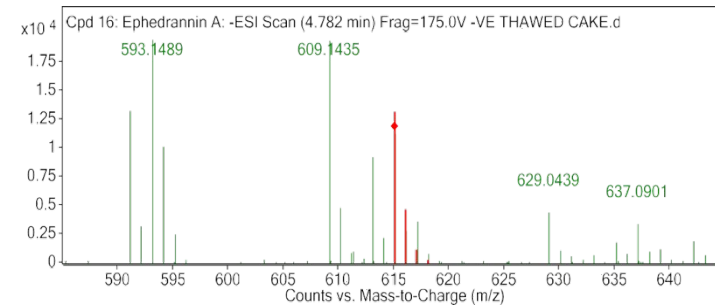

**Ephedrannin A**

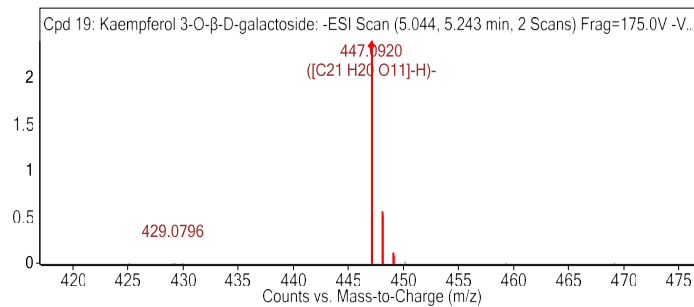

**Kaempferol 3-O-β-D- galactoside**

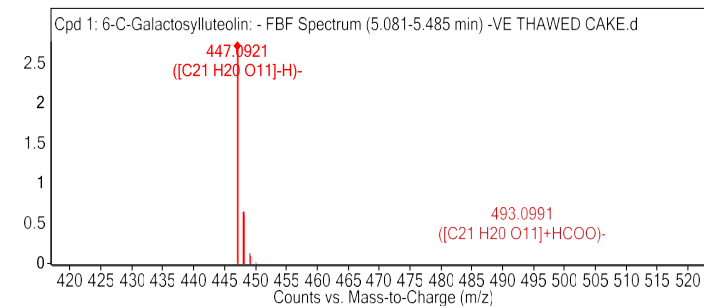

**6-C-Galactosylluteolin**

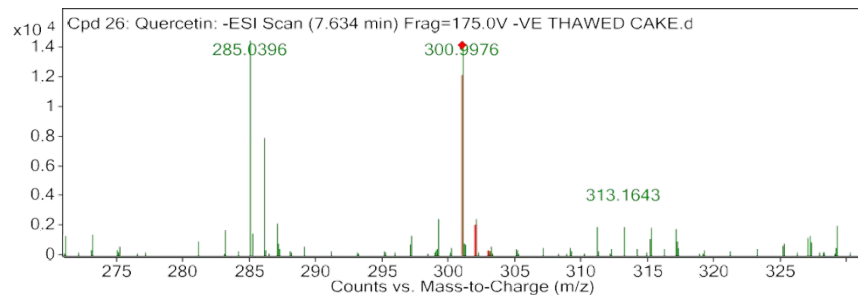

**Quercetin**

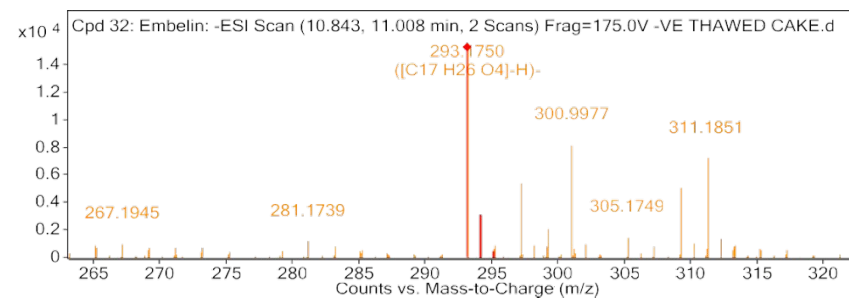

**Embelin**

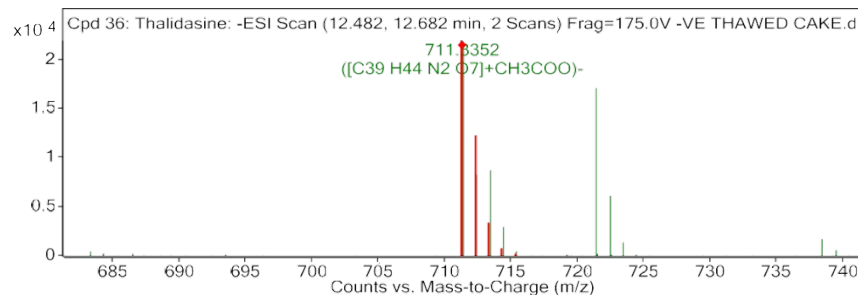

**Thalidasine**

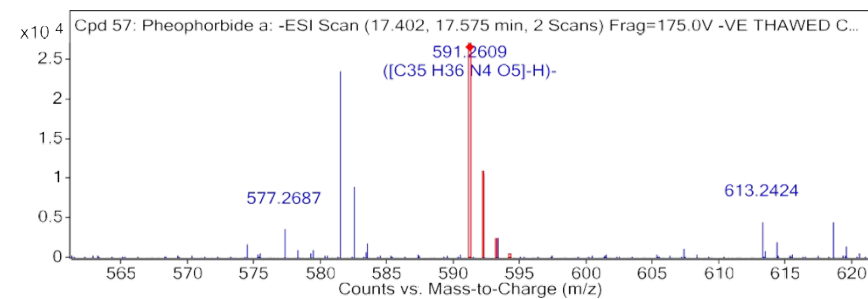

**Pheophorbide a**

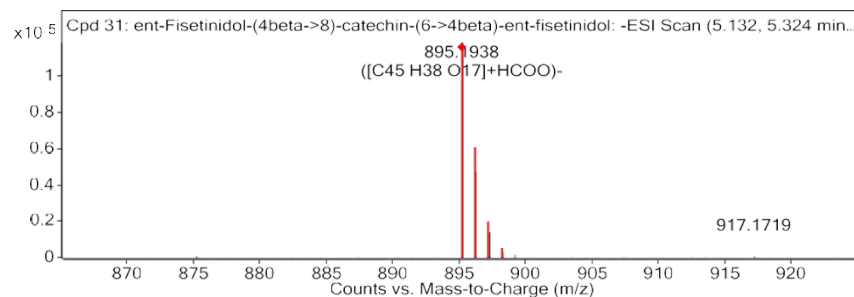

**ent-Fisetinidol- (4beta->8)-catechin-(6->4beta)-ent-fisetinidol**

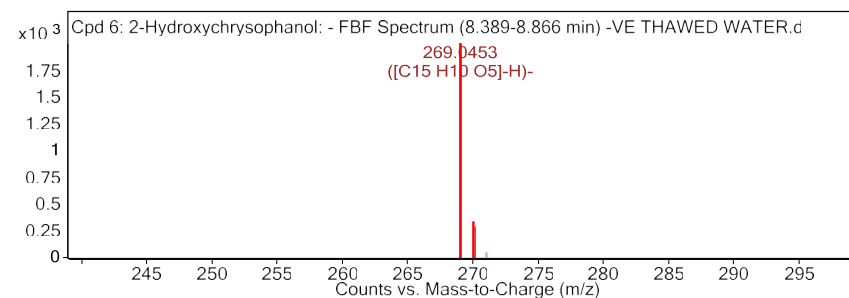

**2-Hydroxychrysophanol**

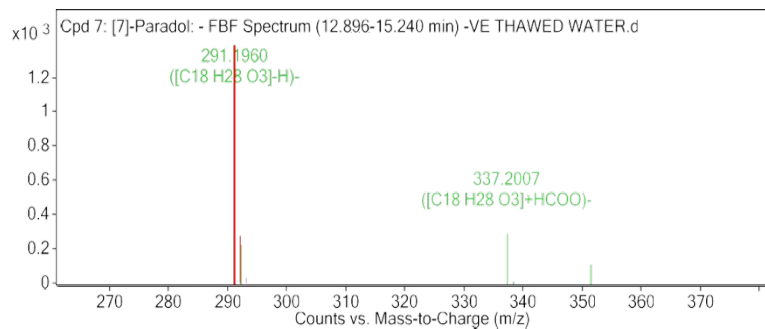

**[7]-Paradol**

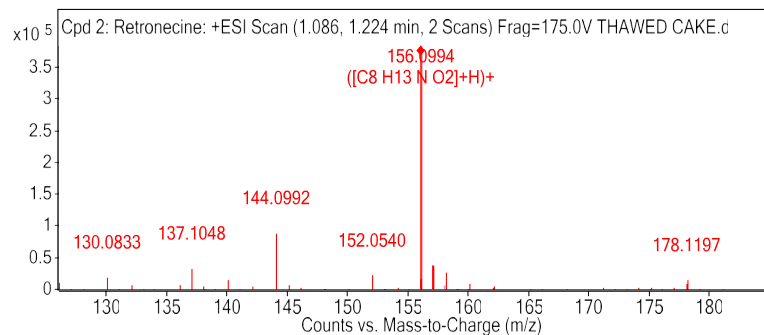

**Retronecine**

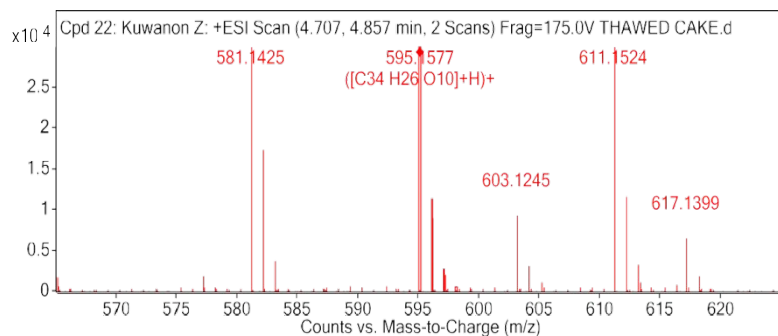

**Kuwanon Z**

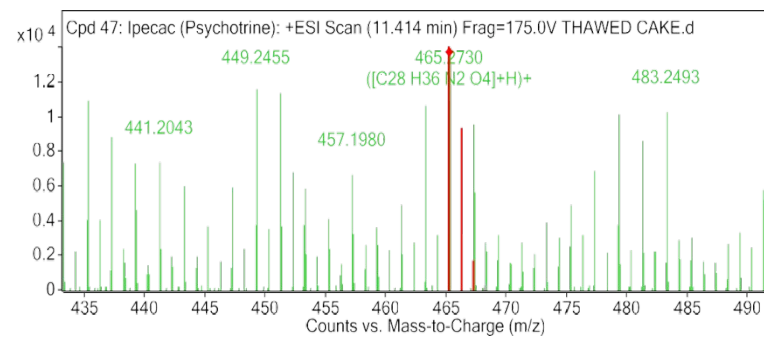

**Ipecac (Psychotrine)**

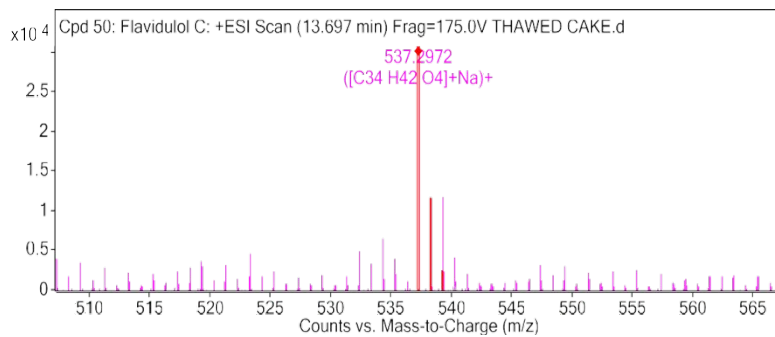

**Flavidulol C**

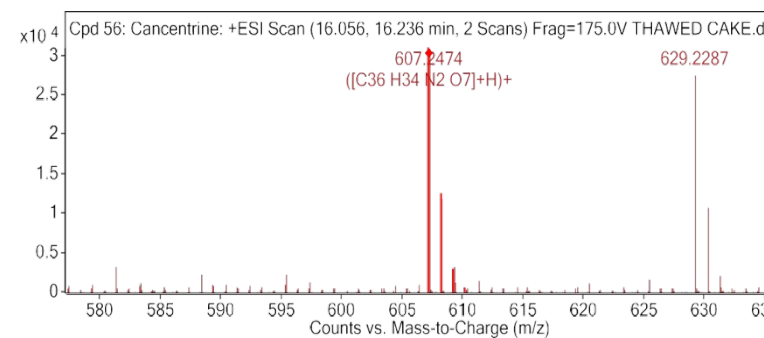

**Cancentrine**

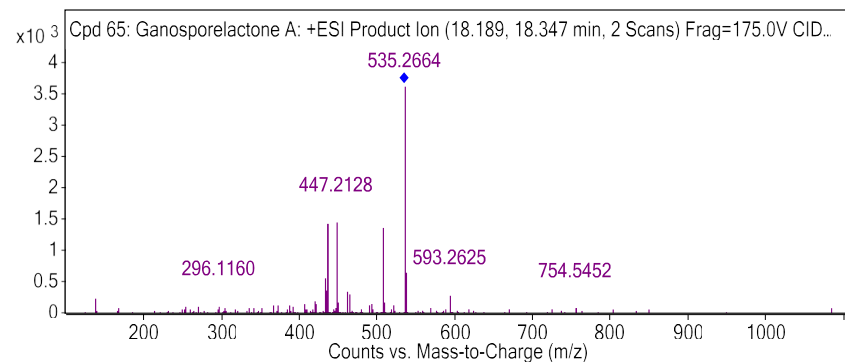

**Ganosporelactone A**

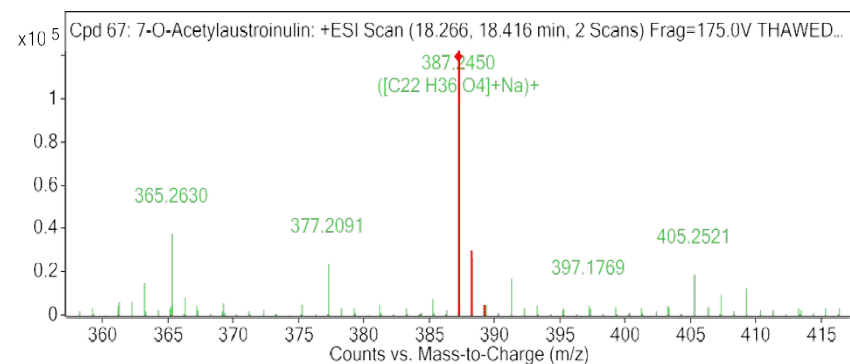

**7-O-Acetylaustroinulin**

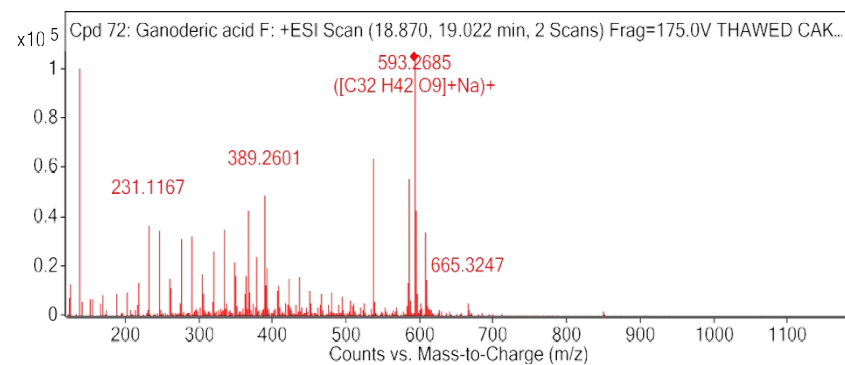

**Ganoderic acid F**

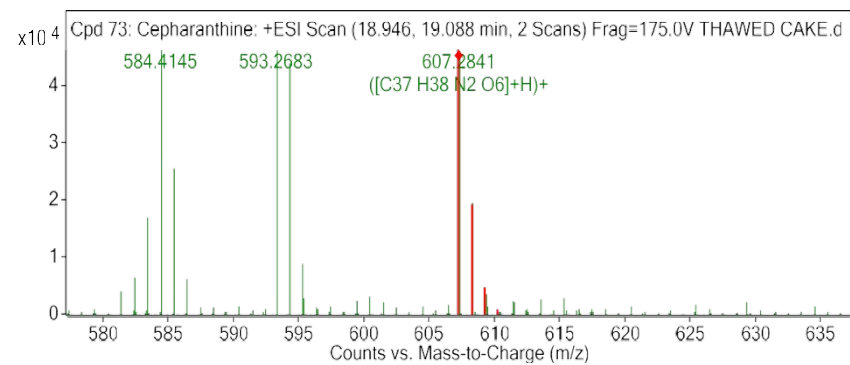

**Cepharanthine**
